# Supplementary material for: Mutual Jellification of Two Bactericidal Cationic Polymers: Synthesis and Physicochemical Characterization of a New Two-Component Hydrogel
Source: MDPI journal article supplement (doi:10.3390/pharmaceutics14112444), 2022-11-11
Supplement: s1 [file s1]

## Supplementary Materials

# Mutual Jellification of Two Bactericidal Cationic Polymers: Synthesis and Physicochemical Characterization of a New Two-Components Hydrogel

Silvana Alfei <sup>1,\*</sup>, Alessia Zorzoli <sup>2</sup>, Danilo Marimpietri <sup>2</sup>, Anna Maria Schito <sup>3</sup>, and Eleonora Russo <sup>1,\*</sup>

<sup>1</sup> Department of Pharmacy, University of Genoa, Viale Cembrano, 16148 Genoa, Italy

<sup>2</sup> Cell Factory, IRCCS Istituto Giannina Gaslini, via Gerolamo Gaslini 5, 16147 Genoa, Italy

<sup>3</sup> Department of Surgical Sciences and Integrated Diagnostics (DISC), University of Genoa, Viale Benedetto XV, 6, 16132 Genova, Italy

\* Correspondence: alfei@difar.unige.it; Tel.: +39 010 355 2296 (S.A.), eleonora.russo@unige.it (E.R.)

### Section S1

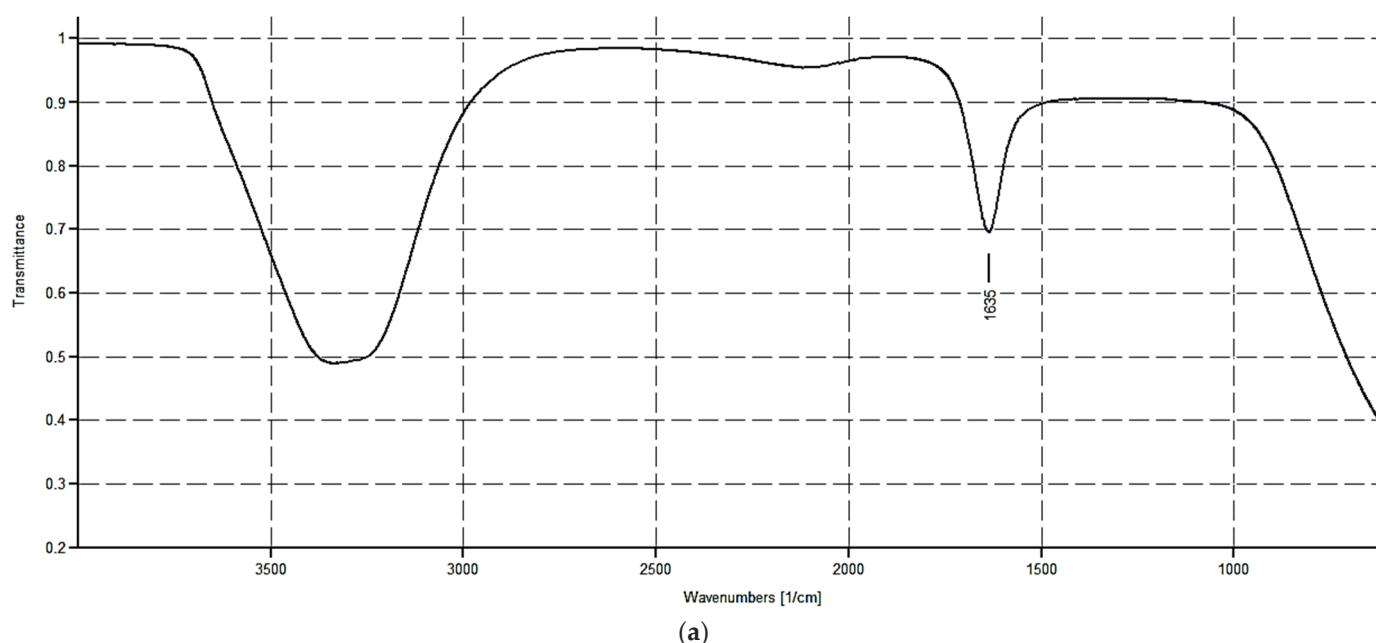

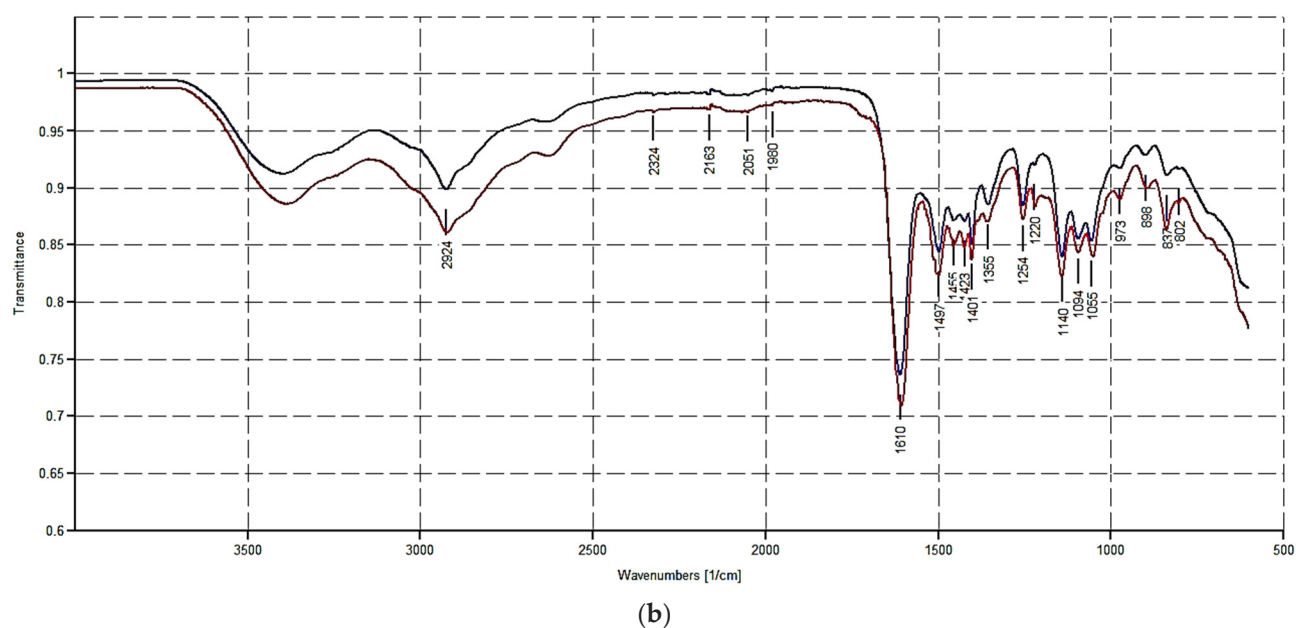

**Figure S1.** ATR-FTIR spectra of soaked CP1\_1.1-Hgel (a) and of dried CP1\_1.1-Hgel (dark-blue line) compared with the spectrum of CP1 (red line) (b).

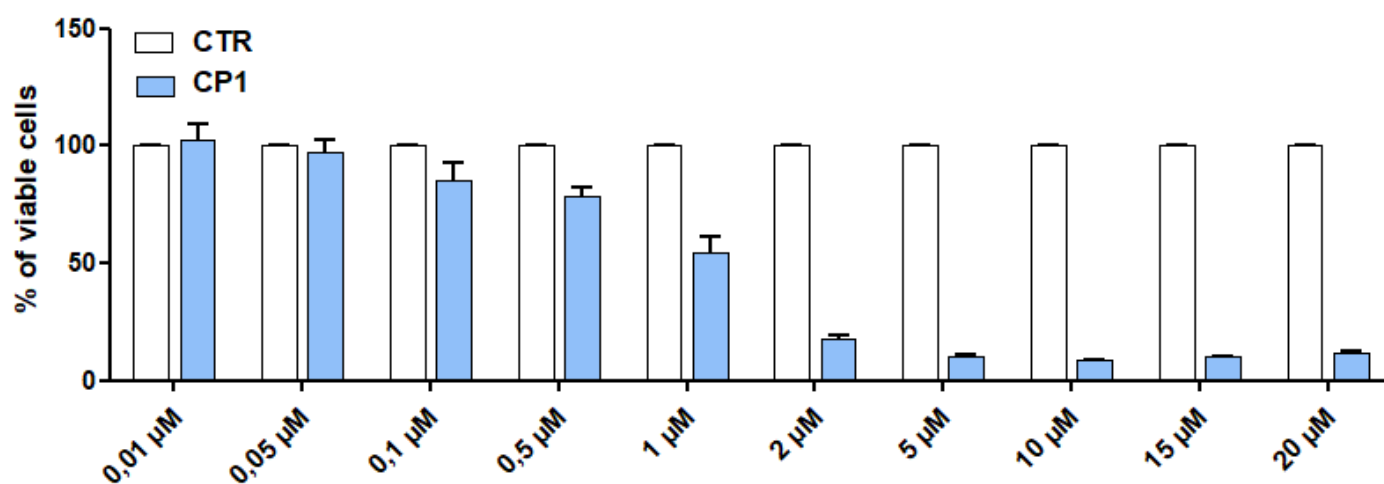

**Figure S2.** Results from dose-dependent cytotoxicity experiments carried out on MAIL-2 human cells at 4 hours exposure to CP1.

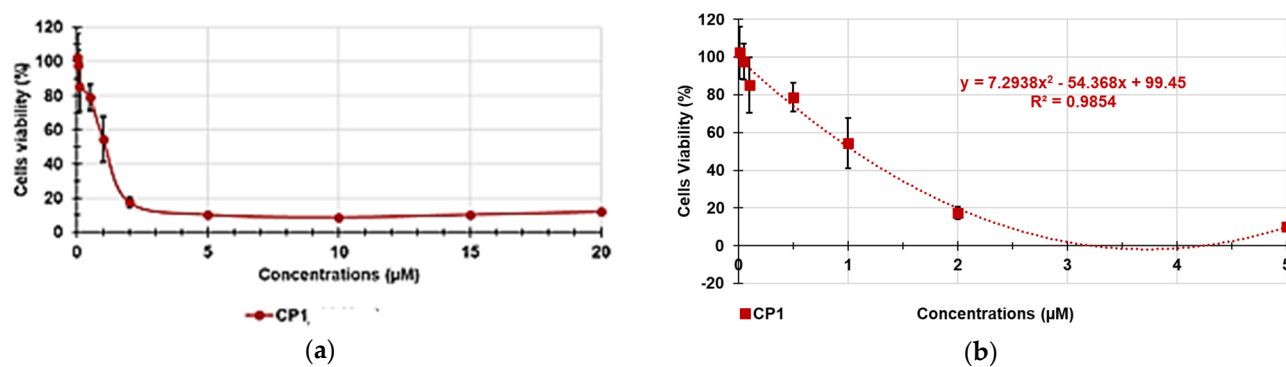

**Figure S3.** Curves of viability (%) of MAIL-2 cells at 4 hours of exposure vs. concentrations (0.01-20 µM) of CP1 (a); polynomial tendency line fitting the dispersion graphs obtained reporting in graph the cell viability % vs. the concentration of the sample at 4 hours of exposure (b).

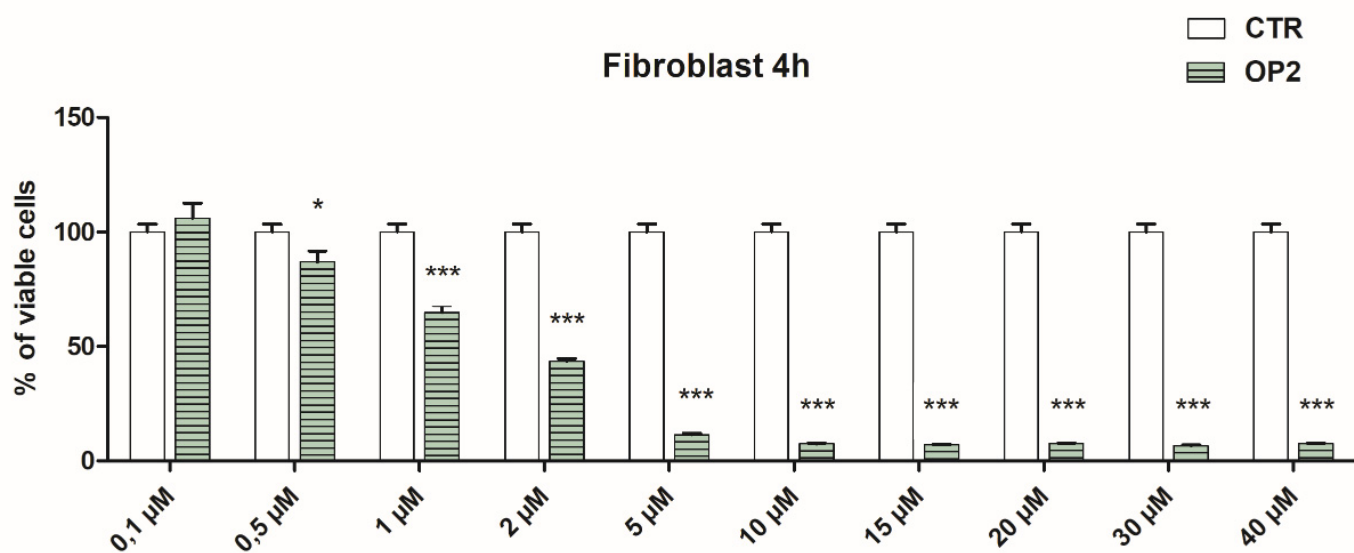

**Figure S4.** Results from dose-dependent cytotoxicity experiments carried out on MAIL-2 human cells at 4 hours exposure to OP2.

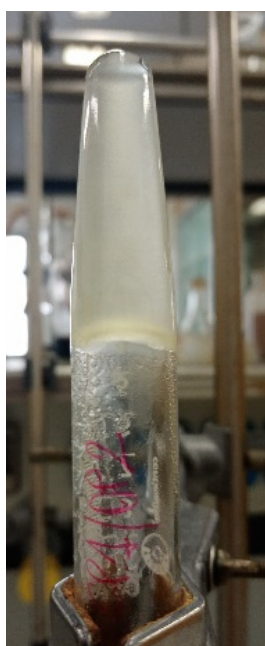

**Figure S5.** CP1OP2-Hgel obtained as described in Section 2.4 of the associated article, whose volume and weight corresponded to those of gel at its max swelling capability.

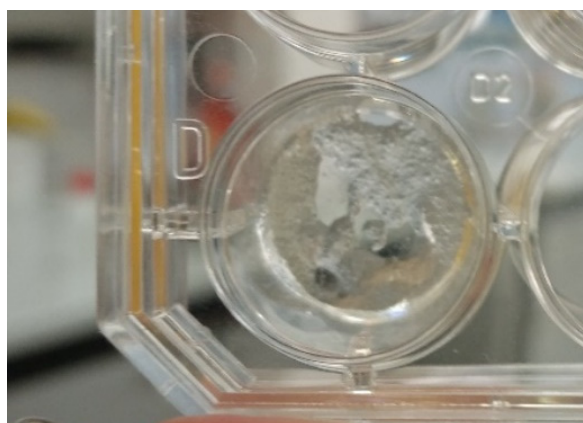

(a)

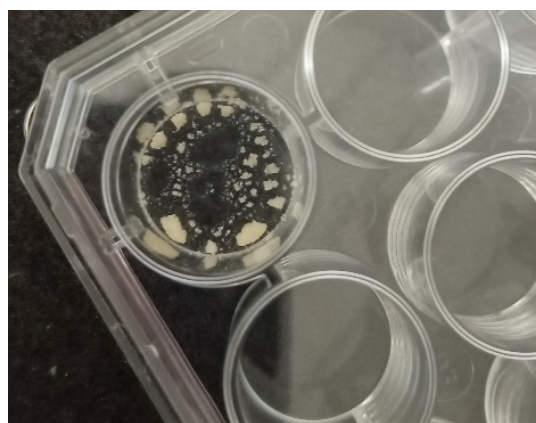

(b)

**Figure S6.** Appearance of CP1OP2-Hgel at the time  $t_0$  of the experiments carried out to monitor the water loss in time (a); appearance of the fully dried sample (time  $t_{10}$ ) (b).

**Table S1.** Weights of gel at times  $T_0$ - $T_{10}$ , and the computed cumulative weight loss ratio percentages.

|       | Time (h) | Gel (mg) | Weight loss (%) |
|-------|----------|----------|-----------------|
| $T_0$ | 0        | 198.4    | 0               |
| $T_1$ | 0.5      | 191.5    | 3.5             |
| $T_2$ | 1        | 164.7    | 17              |
| $T_3$ | 1.5      | 164.3    | 17.2            |
| $T_4$ | 2.5      | 142.5    | 28.2            |
| $T_5$ | 3        | 135.4    | 31.8            |
| $T_6$ | 4        | 122.0    | 38.5            |
| $T_7$ | 6        | 84.6     | 57.4            |
| $T_8$ | 7        | 65.0     | 67.2            |
| $T_9$ | 8        | 52.9     | 73.3            |

T<sub>10</sub>

24

10.9

94.5

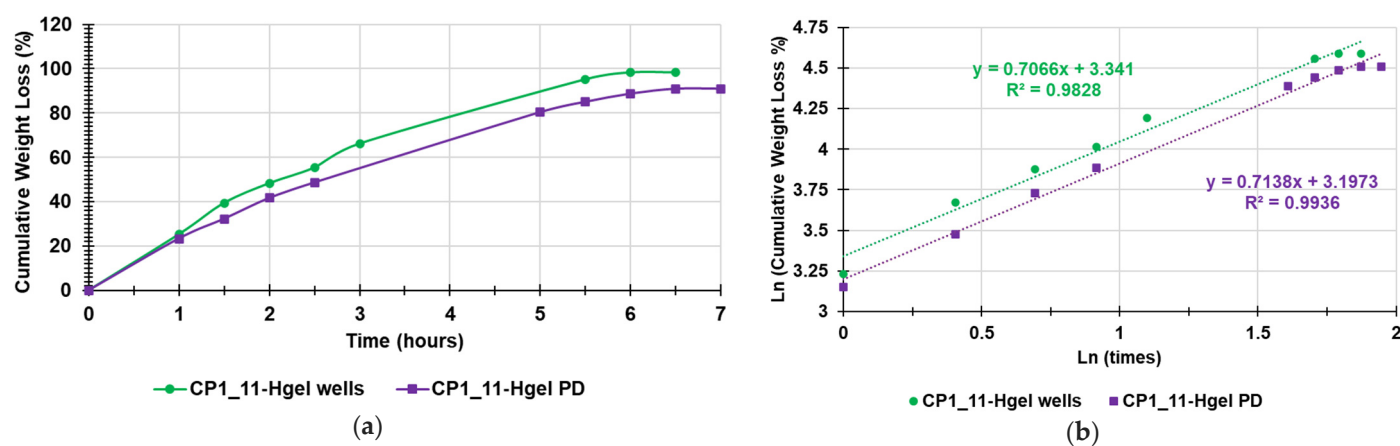

**Figure S7.** Cumulative weight loss percentage curves of gel into Ws (green line) and of that into the PD (purple line) (a); Korsmeyer-peppas kinetic models fitting data of cumulative weight loss curves (b).

**Table S2.** Values of coefficients of determination obtained for all the kinetic models used.

| Kinetic model           | R <sup>2</sup> Hydrogel in Ws | R <sup>2</sup> Hydrogel in PD |
|-------------------------|-------------------------------|-------------------------------|
| Zero order              | 0.9525                        | 0.9667                        |
| First Order             | 0.9549                        | 0.9906                        |
| Hixson-Crowel           | 0.9525                        | 0.9667                        |
| Higuchi                 | 0.9780                        | 0.9777                        |
| <b>Korsmeyer-peppas</b> | <b>0.9828</b>                 | <b>0.9936</b>                 |
